# Supplementary material for: Coping strategies, satisfaction with life, and quality of life in Crohn’s disease: A gender perspective using structural equation modeling analysis
Source: PLoS One. 2017 Feb 28;12(2):e0172779. doi: 10.1371/journal.pone.0172779 (PMC5330481; doi:10.1371/journal.pone.0172779)
Supplement: S1 File — (DOCX) [file pone.0172779.s001.docx]

**Table A**. **Pearson correlation coefficients matrix of the demographic, medical and psychological characteristics of the cohort, separated by the state of disease and by gender.**

|  | **Economic status** | | | | | | | | |
| --- | --- | --- | --- | --- | --- | --- | --- | --- | --- |
| All States of Disease | | | Active Disease | | | Disease Remission | | |
| All | F | M | All | F | M | All | F | M |
| Number of children | 0.091 | 0.072 | 0.121 | 0.123 | 0.143 | 0.094 | 0.114 | 0.040 | 0.196 |
| Emotion-focused | -0.018 | 0.105 | -.173* | -0.027 | 0.085 | -0.189 | -0.002 | 0.110 | -0.112 |
| Problem-focused | -0.070 | 0.029 | -.180* | 0.057 | 0.138 | -0.089 | -.176** | -0.093 | -.232* |
| Dysfunctional | -.266** | -.240** | -.279** | -.187* | -0.148 | -0.241 | -.266** | -.281** | -.208* |
| SIBDQ | .381** | .313** | .457** | .360** | .241** | .546** | .231** | .251** | 0.147 |
| SWLS | .460** | .397** | .550** | .397** | .307** | .529** | .469** | .450** | .501** |

*p≤0.05;** p≤0.01

|  | **Number of children** | | | | | | | | |
| --- | --- | --- | --- | --- | --- | --- | --- | --- | --- |
| All States of Disease | | | Active Disease | | | Disease Remission | | |
| All | F | M | All | F | M | All | F | M |
| Number of children | 0.091 | 0.072 | 0.121 | 0.123 | 0.143 | 0.094 | 0.114 | 0.040 | 0.196 |
| Emotion-focused | -0.058 | -0.057 | -0.067 | -0.002 | 0.053 | -0.083 | -0.124 | -.187* | -0.063 |
| Problem-focused | -.185** | -.203** | -.182* | -.161* | -0.178 | -0.149 | -.218** | -.232* | -.217* |
| Dysfunctional | -0.026 | -0.067 | 0.010 | 0.011 | 0.010 | 0.006 | -0.102 | -.211* | -0.005 |
| SIBDQ | -0.048 | -0.010 | -0.083 | -0.033 | 0.036 | -0.131 | 0.038 | 0.092 | -0.011 |
| SWLS | .171** | .216** | 0.113 | .225** | .323** | 0.069 | .154* | 0.121 | 0.192 |

*p≤0.05;** p≤0.01

|  | **Emotion-focused Coping** | | | | | | | | |
| --- | --- | --- | --- | --- | --- | --- | --- | --- | --- |
| All States of Disease | | | Active Disease | | | Disease Remission | | |
| All | F | M | All | F | M | All | F | M |
| Number of children | -0.018 | 0.105 | -.173* | -0.027 | 0.085 | -0.189 | -0.002 | 0.110 | -0.112 |
| Emotion-focused | -0.058 | -0.057 | -0.067 | -0.002 | 0.053 | -0.083 | -0.124 | -.187* | -0.063 |
| Problem-focused | .592** | .605** | .563** | .529** | .584** | .440** | .638** | .619** | .642** |
| Dysfunctional | .375** | .264** | .510** | .299** | .207* | .429** | .441** | .328** | .557** |
| SIBDQ | -0.057 | 0.057 | -.184* | 0.004 | 0.029 | -0.032 | -0.117 | 0.044 | -.280** |
| SWLS | .111* | .246** | -0.093 | .241** | .370** | 0.040 | -0.006 | 0.109 | -0.177 |

*p≤0.05;** p≤0.01

|  | **Problem-focused Coping** | | | | | | | | |
| --- | --- | --- | --- | --- | --- | --- | --- | --- | --- |
| All States of Disease | | | Active Disease | | | Disease Remission | | |
| All | F | M | All | F | M | All | F | M |
| Number of children | -0.070 | 0.029 | -.180* | 0.057 | 0.138 | -0.089 | -.176** | -0.093 | -.232* |
| Emotion-focused | -.185** | -.203** | -.182* | -.161* | -0.178 | -0.149 | -.218** | -.232* | -.217* |
| Problem-focused | .592** | .605** | .563** | .529** | .584** | .440** | .638** | .619** | .642** |
| Dysfunctional | .401** | .278** | .538** | .317** | .211* | .495** | .473** | .355** | .571** |
| SIBDQ | -.116* | -0.048 | -.159* | -0.126 | -0.105 | -0.147 | -.171* | -0.093 | -0.189 |
| SWLS | -0.088 | 0.011 | -.246** | -0.001 | 0.096 | -0.196 | -.175** | -0.104 | -.282** |

*p≤0.05;** p≤0.01

|  | **Dysfunctional coping** | | | | | | | | |
| --- | --- | --- | --- | --- | --- | --- | --- | --- | --- |
| All States of Disease | | | Active Disease | | | Disease Remission | | |
| All | F | M | All | F | M | All | F | M |
| Number of children | -.266** | -.240** | -.279** | -.187* | -0.148 | -0.241 | -.266** | -.281** | -.208* |
| Emotion-focused | -0.026 | -0.067 | 0.010 | 0.011 | 0.010 | 0.006 | -0.102 | -.211* | -0.005 |
| Problem-focused | .375** | .264** | .510** | .299** | .207* | .429** | .441** | .328** | .557** |
| Dysfunctional | .401** | .278** | .538** | .317** | .211* | .495** | .473** | .355** | .571** |
| SIBDQ | -.415** | -.343** | -.479** | -.355** | -.325** | -.396** | -.403** | -.317** | -.461** |
| SWLS | -.275** | -.214** | -.364** | -.177* | -0.079 | -.322** | -.313** | -.311** | -.330** |

*p≤0.05;** p≤0.01

|  | **SIBDQ** | | | | | | | | |
| --- | --- | --- | --- | --- | --- | --- | --- | --- | --- |
| All States of Disease | | | Active Disease | | | Disease Remission | | |
| All | F | M | All | F | M | All | F | M |
| Economic status | .381** | .313** | .457** | .360** | .241** | .546** | .231** | .251** | 0.147 |
| Number of children | -0.048 | -0.010 | -0.083 | -0.033 | 0.036 | -0.131 | 0.038 | 0.092 | -0.011 |
| Emotion-focused | -0.057 | 0.057 | -.184* | 0.004 | 0.029 | -0.032 | -0.117 | 0.044 | -.280** |
| Problem-focused | -.116* | -0.048 | -.159* | -0.126 | -0.105 | -0.147 | -.171* | -0.093 | -0.189 |
| Dysfunctional | -.415** | -.343** | -.479** | -.355** | -.325** | -.396** | -.403** | -.317** | -.461** |
| SWLS | .469** | .452** | .514** | .510** | .483** | .571** | .352** | .364** | .351** |

*p≤0.05;** p≤0.01

|  | **SWLS** | | | | | | | | |
| --- | --- | --- | --- | --- | --- | --- | --- | --- | --- |
| All States of Disease | | | Active Disease | | | Disease Remission | | |
| All | F | M | All | F | M | All | F | M |
| Economic status | .460** | .397** | .550** | .397** | .307** | .529** | .469** | .450** | .501** |
| Number of children | .171** | .216** | 0.113 | .225** | .323** | 0.069 | .154* | 0.121 | 0.192 |
| Emotion-focused | .111* | .246** | -0.093 | .241** | .370** | 0.040 | -0.006 | 0.109 | -0.177 |
| Problem-focused | -0.088 | 0.011 | -.246** | -0.001 | 0.096 | -0.196 | -.175** | -0.104 | -.282** |
| Dysfunctional | -.275** | -.214** | -.364** | -.177* | -0.079 | -.322** | -.313** | -.311** | -.330** |
| SIBDQ | .469** | .452** | .514** | .510** | .483** | .571** | .352** | .364** | .351** |

*p≤0.05;** p≤0.01

|  | **P-HBI** | | |
| --- | --- | --- | --- |
| All | F | M |
|
| Economic status | -.243** | -.162* | -.342** |
| Number of children | .146** | .172** | 0.105 |
| Emotion-focused | 0.015 | -0.041 | 0.080 |
| Problem-focused | -0.010 | -0.058 | 0.021 |
| Dysfunctional | .207** | .172** | .230** |
| SIBDQ | -.666** | -.633** | -.707** |
| SWLS | -.255** | -.241** | -.281** |

*p≤0.05;** p≤0.01
